# Supplementary material for: Antimicrobial activity and synergistic effect of phage-encoded antimicrobial peptides with colistin and outer membrane permeabilizing agents against Acinetobacter baumannii
Source: PeerJ journal article supplement (doi:10.7717/peerj.18722), 2024-12-24
Supplement: GmellonellaGroup1.pdf [file GmellonellaGroup1.pdf]

| Group 1       | Day 1                                                                               | Day 5                                                                                | Day 10                                                                                |
|---------------|-------------------------------------------------------------------------------------|--------------------------------------------------------------------------------------|---------------------------------------------------------------------------------------|
| Not Injection |    |    |    |
| Only PBS      |   |   |   |
| Only CR04-WT  |  |  |  |

|                           |                                                                                    |                                                                                     |                                                                                      |
|---------------------------|------------------------------------------------------------------------------------|-------------------------------------------------------------------------------------|--------------------------------------------------------------------------------------|
| Only CR04-NH <sub>2</sub> |   |   |   |
| CR04-CPP                  |   |   |   |
| Only AB329                |  |  |  |

|                                           |                                                                                    |                                                                                     |                                                                                      |
|-------------------------------------------|------------------------------------------------------------------------------------|-------------------------------------------------------------------------------------|--------------------------------------------------------------------------------------|
| <p>CR04-WT with<br/>AB329</p>             |   |   |   |
| <p>CR04-NH<sub>2</sub><br/>with AB329</p> |   |   |   |
| <p>CR04-CPP<br/>with AB329</p>            |  |  |  |

|                                                              |                                                                                    |                                                                                     |                                                                                      |
|--------------------------------------------------------------|------------------------------------------------------------------------------------|-------------------------------------------------------------------------------------|--------------------------------------------------------------------------------------|
| <p>Post-Treatment<br/>CR04-WT with<br/>AB329</p>             |   |   |   |
| <p>Post-Treatment<br/>CR04-NH<sub>2</sub> with<br/>AB329</p> |   |   |   |
| <p>Post-Treatment<br/>CR04-CPP with<br/>AB329</p>            |  |  |  |

|  |  |  |  |
|--|--|--|--|
|  |  |  |  |
|--|--|--|--|
