# Supplementary material for: Antimicrobial activity and synergistic effect of phage-encoded antimicrobial peptides with colistin and outer membrane permeabilizing agents against Acinetobacter baumannii
Source: PeerJ journal article supplement (doi:10.7717/peerj.18722), 2024-12-24
Supplement: GmellonellaGroup3.pdf [file GmellonellaGroup3.pdf]

| Group 3       | Day 1 |                                                                                     | Day 5 |                                                                                      | Day 10 |                                                                                       |
|---------------|-------|-------------------------------------------------------------------------------------|-------|--------------------------------------------------------------------------------------|--------|---------------------------------------------------------------------------------------|
| Not Injection |       |    |       |    |        |    |
| Only PBS      |       |   |       |   |        |   |
| Only CR04-WT  |       |  |       |  |        |  |

|                              |  |                                                                                    |  |                                                                                     |  |                                                                                      |  |
|------------------------------|--|------------------------------------------------------------------------------------|--|-------------------------------------------------------------------------------------|--|--------------------------------------------------------------------------------------|--|
| Only<br>CR04-NH <sub>2</sub> |  |   |  |   |  |   |  |
| CR04-CPP                     |  |   |  |   |  |   |  |
| Only<br>AB329                |  |  |  |  |  |  |  |

|                                               |  |                                                                                    |  |                                                                                     |  |                                                                                      |  |
|-----------------------------------------------|--|------------------------------------------------------------------------------------|--|-------------------------------------------------------------------------------------|--|--------------------------------------------------------------------------------------|--|
| <p>CR04-WT<br/>with<br/>AB329</p>             |  |   |  |   |  |   |  |
| <p>CR04-NH<sub>2</sub><br/>with<br/>AB329</p> |  |   |  |   |  |   |  |
| <p>CR04-CPP<br/>with<br/>AB329</p>            |  |  |  |  |  |  |  |



|                                                                  |  |                                                                                    |  |                                                                                     |  |                                                                                      |  |
|------------------------------------------------------------------|--|------------------------------------------------------------------------------------|--|-------------------------------------------------------------------------------------|--|--------------------------------------------------------------------------------------|--|
| <p>Post-Treatment<br/>CR04-WT<br/>with<br/>AB329</p>             |  |   |  |   |  |   |  |
| <p>Post-Treatment<br/>CR04-NH<sub>2</sub><br/>with<br/>AB329</p> |  |   |  |   |  |   |  |
| <p>Post-Treatment<br/>CR04-CPP<br/>with<br/>AB329</p>            |  |  |  |  |  |  |  |
