# Supplementary material for: Antimicrobial activity and synergistic effect of phage-encoded antimicrobial peptides with colistin and outer membrane permeabilizing agents against Acinetobacter baumannii
Source: PeerJ. 2024 Dec 24;12:e18722. doi: 10.7717/peerj.18722 (PMC11674141; doi:10.7717/peerj.18722)
Supplement: Supplemental Information 2 — Checkerboard synergy testing was performed using peptides and tested agents in the 96-well plate. The plate was prepared in such a way to vary peptides’ two-fold concentrations in rows and tested agents in columns of the 96-well plate. A. baumannii ATCC19606 inocula of 5×105 CFU/ml were added to each well, and the plates were incubated at 37°C overnight. After incubation, 25 µl of 0.1% TTC was added to each well and incubated for an additional hour. The experiment was done in triplicate, and results were averaged. [file peerj-12-18722-s002.xlsx]

## Sheet: PE04-1
	0.25xMIC(1)	Synergist(1)	0.25xMIC(2)	Synergist(2)	0.25xMIC(3)	Synergist(3)	Positive control	Negative control
Benzolic acid	1.477	0.911	1.59	0.9	1.581	0.921	1.507	0.045
Lactic acid	1.68	0.524	1.874	0.551	1.905	0.544	1.472	0.047
Malic acid	1.424	0.461	1.625	0.483	1.508	0.471	1.508	0.049
Citric acid	1.348	0.501	1.386	0.053	1.303	0.058	1.509	0.046
EDTA	1.396	0.424	1.507	0.448	1.514	0.463	1.551	0.05
Colistin	1.123	0.051	1.139	0.052	1.107	0.056	1.511	0.047
CR04-WT	1.22		1.181		0.898
Synergist (1)		Benzolic acid	Lactic acid	Malic acid	Citric acid	EDTA	Colistin	CR04-WT
	0.25 MIC	1.477	1.68	1.424	1.348	1.396	1.123	1.22		Control =	1.4895
	Synergist (1)	0.911	0.524	0.461	0.051	0.424	0.051			Blank =	0.046
										control-blank	1.4435
OD 0.25 MIC - Odblank		1.431	1.634	1.378	1.302	1.35	1.077	1.174
ODsynergist - Odblank		0.865	0.478	0.415	0.005	0.378	0.005
synergise
Ab. Of control		1.4435	1.4435	1.4435	1.4435	1.4435	1.4435
Ab. Of treated well		0.865	0.478	0.415	0.005	0.378	0.005
control-treated well		0.5785	0.9655	1.0285	1.4385	1.0655	1.4385
Control-treated well / Control		0.400762	0.66886	0.712504	0.996536	0.738136	0.996536
% Inhibition		40.0762	66.886	71.2504	99.6536	73.8136	99.6536
Synergist (2)		Benzolic acid	Lactic acid	Malic acid	Citric acid	EDTA	Colistin	CR04-WT
	0.25 MIC	1.59	1.874	1.625	1.386	1.507	1.139	1.181		Control =	1.5085
	Synergist (1)	0.9	0.551	0.483	0.053	0.448	0.052			Blank =	0.0475
										control-blank	1.461
OD 0.25 MIC - Odblank		1.5425	1.8265	1.5775	1.3385	1.4595	1.0915	1.1335
ODsynergist - Odblank		0.8525	0.5035	0.4355	0.0055	0.4005	0.0045
synergise
Ab. Of control		1.461	1.461	1.461	1.461	1.461	1.461
Ab. Of treated well		0.8525	0.5035	0.4355	0.0055	0.4005	0.0045
control-treated well		0.6085	0.9575	1.0255	1.4555	1.0605	1.4565
Control-treated well / Control		0.416496	0.655373	0.701916	0.996235	0.725873	0.99692
% Inhibition		41.6496	65.5373	70.1916	99.6235	72.5873	99.692
Synergist (3)		Benzolic acid	Lactic acid	Malic acid	Citric acid	EDTA	Colistin	CR04-WT
	0.25 MIC	1.581	1.905	1.508	1.303	1.514	1.107	0.898		Control =	1.531
	Synergist (1)	0.921	0.544	0.471	0.058	0.463	0.056			Blank =	0.0485
										control-blank	1.4825
OD 0.25 MIC - Odblank		1.5325	1.8565	1.4595	1.2545	1.4655	1.0585	0.8495
ODsynergist - Odblank		0.8725	0.4955	0.4225	0.0095	0.4145	0.0075
synergise
Ab. Of control		1.4825	1.4825	1.4825	1.4825	1.4825	1.4825
Ab. Of treated well		0.8725	0.4955	0.4225	0.0095	0.4145	0.0075
control-treated well		0.61	0.987	1.06	1.473	1.068	1.475
Control-treated well / Control		0.411467	0.665767	0.715008	0.993592	0.720405	0.994941
% Inhibition		41.1467	66.5767	71.5008	99.3592	72.0405	99.4941
Mean %Inhibition		40.9575	66.3334	70.981	99.5455	72.8138	99.6132
Sd %inhibition		0.803562	0.706538	0.694948	0.162006	0.908033	0.104946
Benzolic acid	40.96
Malic acid	66.33
Lactic acid	70.98
Citric acid	99.55
EDTA	72.81
Colistin	99.61

## Sheet: PE04-1(NH2)
	0.25xMIC(1)	Synergist(1)	0.25xMIC(2)	Synergist(2)	0.25xMIC(3)	Synergist(3)	Positive control	Negative control
Benzolic acid	1.467	0.911	1.588	0.94	1.584	0.935	1.481	0.047
Lactic acid	1.751	0.78	1.72	0.763	1.765	0.791	1.525	0.047
Malic acid	1.484	0.264	1.537	0.261	1.577	0.253	1.529	0.049
Citric acid	1.122	0.049	1.269	0.049	1.214	0.05	1.495	0.047
EDTA	1.403	0.292	1.487	0.303	1.428	0.307	1.536	0.046
Colistin	1.191	0.048	1.317	0.049	1.391	0.048	1.555	0.047
CR04-WT	1.418		1.429		1.517
Synergist (1)		Benzolic acid	Lactic acid	Malic acid	Citric acid	EDTA	Colistin	CR04-WT-NH2
	0.25 MIC	1.467	1.751	1.484	1.122	1.403	1.191	1.418		Control =	1.503
	Synergist (1)	0.911	0.78	0.264	0.049	0.292	0.048			Blank =	0.047
										control-blank	1.456
OD 0.25 MIC - Odblank		1.42	1.704	1.437	1.075	1.356	1.144	1.371
ODsynergist - Odblank		0.864	0.733	0.217	0.002	0.245	0.001
synergise
Ab. Of control		1.456	1.456	1.456	1.456	1.456	1.456
Ab. Of treated well		0.864	0.733	0.217	0.002	0.245	0.001
control-treated well		0.592	0.723	1.239	1.454	1.211	1.455
Control-treated well / Control		0.406593	0.496566	0.850962	0.998626	0.831731	0.999313
% Inhibition		40.6593	49.6566	85.0962	99.8626	83.1731	99.9313
Synergist (2)		Benzolic acid	Lactic acid	Malic acid	Citric acid	EDTA	Colistin	CR04-WT-NH2
	0.25 MIC	1.588	1.72	1.537	1.269	1.487	1.317	1.429		Control =	1.512
	Synergist (1)	0.94	0.763	0.261	0.049	0.303	0.049			Blank =	0.048
										control-blank	1.464
OD 0.25 MIC - Odblank		1.54	1.672	1.489	1.221	1.439	1.269	1.381
ODsynergist - Odblank		0.892	0.715	0.213	0.001	0.255	0.001
synergise
Ab. Of control		1.464	1.464	1.464	1.464	1.464	1.464
Ab. Of treated well		0.892	0.715	0.213	0.001	0.255	0.001
control-treated well		0.572	0.749	1.251	1.463	1.209	1.463
Control-treated well / Control		0.39071	0.511612	0.854508	0.999317	0.82582	0.999317
% Inhibition		39.071	51.1612	85.4508	99.9317	82.582	99.9317
Synergist (3)		Benzolic acid	Lactic acid	Malic acid	Citric acid	EDTA	Colistin	CR04-WT-NH2
	0.25 MIC	1.584	1.765	1.577	1.214	1.428	1.391	1.517		Control =	1.5455
	Synergist (1)	0.935	0.791	0.253	0.05	0.307	0.048			Blank =	0.0465
										control-blank	1.499
OD 0.25 MIC - Odblank		1.5375	1.7185	1.5305	1.1675	1.3815	1.3445	1.4705
ODsynergist - Odblank		0.8885	0.7445	0.2065	0.0035	0.2605	0.0015
synergise
Ab. Of control		1.499	1.499	1.499	1.499	1.499	1.499
Ab. Of treated well		0.8885	0.7445	0.2065	0.0035	0.2605	0.0015
control-treated well		0.6105	0.7545	1.2925	1.4955	1.2385	1.4975
Control-treated well / Control		0.407272	0.503336	0.862241	0.997665	0.826217	0.998999
% Inhibition		40.7272	50.3336	86.2241	99.7665	82.6217	99.8999
Mean %Inhibition		40.1525	50.3838	85.5904	99.8536	82.7923	99.921
Sd %inhibition		0.937196	0.753561	0.576802	0.0829603	0.330393	0.0182297

## Sheet: PE04-2
	0.25xMIC(1)	Synergist(1)	0.25xMIC(2)	Synergist(2)	0.25xMIC(3)	Synergist(3)	Positive control	Negative control
Benzolic acid	1.528	0.762	1.557	0.766	1.578	0.755	1.451	0.046
Lactic acid	1.616	0.225	1.648	0.245	1.699	0.234	1.431	0.047
Malic acid	1.517	0.248	1.518	0.231	1.537	0.259	1.41	0.047
Citric acid	1.184	0.048	1.27	0.05	1.295	0.05	1.455	0.046
EDTA	1.411	0.058	1.512	0.06	1.494	0.059	1.425	0.046
Colistin	1.171	0.05	1.122	0.051	1.1	0.052	1.465	0.047
CR04-WT	0.913		1.076		0.923
Synergist (1)		Benzolic acid	Lactic acid	Malic acid	Citric acid	EDTA	Colistin	CR04-CPP
	0.25 MIC	1.528	1.616	1.517	1.184	1.411	1.171	0.913		Control =	1.441
	Synergist (1)	0.762	0.225	0.248	0.048	0.058	0.05			Blank =	0.0465
										control-blank	1.3945
OD 0.25 MIC - Odblank		1.4815	1.5695	1.4705	1.1375	1.3645	1.1245	0.8665
ODsynergist - Odblank		0.7155	0.1785	0.2015	0.0015	0.0115	0.0035
synergise
Ab. Of control		1.3945	1.3945	1.3945	1.3945	1.3945	1.3945
Ab. Of treated well		0.7155	0.1785	0.2015	0.0015	0.0115	0.0035
control-treated well		0.679	1.216	1.193	1.393	1.383	1.391
Control-treated well / Control		0.486913	0.871997	0.855504	0.998924	0.991753	0.99749
% Inhibition		48.6913	87.1997	85.5504	99.8924	99.1753	99.749
Synergist (2)		Benzolic acid	Lactic acid	Malic acid	Citric acid	EDTA	Colistin	CR04-CPP
	0.25 MIC	1.557	1.648	1.518	1.27	1.512	1.122	1.076		Control =	1.4325
	Synergist (1)	0.766	0.245	0.231	0.05	0.06	0.051			Blank =	0.0465
										control-blank	1.386
OD 0.25 MIC - Odblank		1.5105	1.6015	1.4715	1.2235	1.4655	1.0755	1.0295
ODsynergist - Odblank		0.7195	0.1985	0.1845	0.0035	0.0135	0.0045
synergise
Ab. Of control		1.386	1.386	1.386	1.386	1.386	1.386
Ab. Of treated well		0.7195	0.1985	0.1845	0.0035	0.0135	0.0045
control-treated well		0.6665	1.1875	1.2015	1.3825	1.3725	1.3815
Control-treated well / Control		0.48088	0.856782	0.866883	0.997475	0.99026	0.996753
% Inhibition		48.088	85.6782	86.6883	99.7475	99.026	99.6753
Synergist (3)		Benzolic acid	Lactic acid	Malic acid	Citric acid	EDTA	Colistin	CR04-CPP
	0.25 MIC	1.578	1.699	1.537	1.295	1.494	1.1	0.923		Control =	1.445
	Synergist (1)	0.755	0.234	0.259	0.05	0.059	0.052			Blank =	0.0465
										control-blank	1.3985
OD 0.25 MIC - Odblank		1.5315	1.6525	1.4905	1.2485	1.4475	1.0535	0.8765
ODsynergist - Odblank		0.7085	0.1875	0.2125	0.0035	0.0125	0.0055
synergise
Ab. Of control		1.3985	1.3985	1.3985	1.3985	1.3985	1.3985
Ab. Of treated well		0.7085	0.1875	0.2125	0.0035	0.0125	0.0055
control-treated well		0.69	1.211	1.186	1.395	1.386	1.393
Control-treated well / Control		0.493386	0.865928	0.848051	0.997497	0.991062	0.996067
% Inhibition		49.3386	86.5928	84.8051	99.7497	99.1062	99.6067
Mean %Inhibition		48.706	86.4902	85.6813	99.7965	99.1025	99.677
Sd %inhibition		0.625406	0.765917	0.948382	0.0830487	0.0747471	0.0711614
