# Supplementary material for: Antimicrobial activity and synergistic effect of phage-encoded antimicrobial peptides with colistin and outer membrane permeabilizing agents against Acinetobacter baumannii
Source: PeerJ. 2024 Dec 24;12:e18722. doi: 10.7717/peerj.18722 (PMC11674141; doi:10.7717/peerj.18722)
Supplement: Supplemental Information 3 — Cells were treated with PE04-1 (A), PE04-1(NH2) (B), and PE04-2 peptides (C) at the peptide MIC concentration. Data are expressed as the mean of three independent experiments ± SD. [file peerj-12-18722-s003.xlsx]

## Sheet: RAW DATA
	PE04-1			PE04-1(NH2)			PE04-2
N1 (OD540)	1	2	3	4	5	6	7	8	9	N1 (OD540)
1000 ug/ml	0.886	0.705	0.613	0.448	0.504	0.584	0.344	0.225	0.244	800 ug/ml
800 ug/ml	0.947	0.94	0.922	0.579	0.718	0.692	0.46	0.529	0.439	600 ug/ml
600 ug/ml	1.138	1.029	0.968	0.845	0.896	1.096	0.702	0.903	0.632	300 ug/ml
312.5 ug/ml	1.007	0.965	1.023	1.082	1.054	1.08	0.989	1.04	0.971	156.25 ug/ml
150 ug/ml	1.006	0.962	1.158	1.083	1.043	1.101	1.118	1.025	1.229	50 ug/ml
50 ug/ml	1.104	1.029	1.038	1.18	1.211	1.197	1.157	1.148	0.933	25 ug/ml
0 ug/ml	1.143	1.146	1.114	1.372	1.232	1.313	1.193	1.242	1.14	0 ug/ml
blank	0.074	0.072	0.075							blank
	PE04-1			PE04-1(NH2)			PE04-2
N2 (OD540)	1	2	3	4	5	6	7	8	9	N1 (OD540)
1000 ug/ml	0.483	0.502	0.472	0.302	0.356	0.334	0.165	0.177	0.118	800 ug/ml
800 ug/ml	0.644	0.618	0.646	0.372	0.533	0.478	0.368	0.353	0.323	600 ug/ml
600 ug/ml	0.783	0.699	0.715	0.731	0.736	0.883	0.776	0.693	0.728	300 ug/ml
312.5 ug/ml	0.871	0.841	0.815	0.884	0.804	0.838	0.846	0.848	0.856	156.25 ug/ml
150 ug/ml	0.936	0.898	0.917	1.009	0.815	0.925	0.956	0.881	0.821	50 ug/ml
50 ug/ml	0.937	0.944	0.964	1.019	0.911	0.901	0.77	0.882	0.864	25 ug/ml
0 ug/ml	1.035	0.938	0.91	0.953	0.908	0.918	0.828	0.883	0.84	0 ug/ml
blank	0.077	0.069	0.067							blank
	PE04-1			PE04-1(NH2)			PE04-2
N3 (OD540)	1	2	3	4	5	6	7	8	9	N1 (OD540)
1000 ug/ml	0.617	0.619	0.485	0.186	0.343	0.362	0.283	0.3	0.198	800 ug/ml
800 ug/ml	0.889	0.708	0.831	0.608	0.646	0.773	0.428	0.36	0.408	600 ug/ml
600 ug/ml	0.859	0.904	0.951	0.766	1.007	0.916	0.993	0.86	0.877	300 ug/ml
312.5 ug/ml	0.96	0.942	0.947	0.701	0.907	1.038	0.696	0.861	0.674	156.25 ug/ml
150 ug/ml	0.963	0.952	0.848	0.933	0.992	0.868	1.034	1.05	0.872	50 ug/ml
50 ug/ml	0.991	0.978	0.904	1.047	1.061	1.087	1.149	1.177	0.832	25 ug/ml
0 ug/ml	1.156	1.135	1.091	0.931	1.338	1.201	1.495	1.337	0.969	0 ug/ml
blank	0.075	0.072	0.078							blank

## Sheet: n1
	OD504											OD540-blank									% cell viability
	CR04-WT			CR04-WT-NH2			CR04-CPP					CR04-WT			PE04-1(NH2)			PE04-2			PE04-1			PE04-1(NH2)			PE04-2
N1 (OD540)	1	2	3	4	5	6	7	8	9	N1 (OD540)		1	2	3	4	5	6	7	8	9	1	2	3	4	5	6	7	8	9
1000 ug/ml	0.886	0.705	0.613	0.448	0.504	0.584	0.344	0.225	0.244	800 ug/ml		0.812333	0.631333	0.539333	0.374333	0.430333	0.510333	0.270333	0.151333	0.170333	75.9663	59.5223	50.8485	30.3842	34.9297	41.4232	24.1801	13.5361	15.2355
800 ug/ml	0.947	0.94	0.922	0.579	0.718	0.692	0.46	0.529	0.439	600 ug/ml		0.873333	0.866333	0.848333	0.505333	0.644333	0.618333	0.386333	0.455333	0.365333	82.3382	81.6782	79.9811	41.0173	52.2998	50.1894	34.5558	40.7275	32.6774
600 ug/ml	1.038	1.029	0.968	0.845	0.896	1.096	0.702	0.903	0.632	300 ug/ml		0.964333	0.955333	0.894333	0.771333	0.822333	1.02233	0.628333	0.829333	0.558333	90.9177	90.0691	84.318	62.6082	66.7478	82.9816	56.2016	74.1801	49.9404
312.5 ug/ml	1.007	0.965	1.023	1.082	1.054	1.08	0.989	1.04	0.971	156.25 ug/ml		0.933333	0.891333	0.949333	1.00833	0.980333	1.00633	0.915333	0.966333	0.897333	87.995	84.0352	89.5035	81.8452	79.5725	81.6829	81.8724	86.4341	80.2624
150 ug/ml	1.006	0.962	1.058	1.083	1.043	1.101	1.118	1.025	1.229	50 ug/ml		0.932333	0.888333	0.984333	1.00933	0.969333	1.02733	1.04433	0.951333	1.15533	87.9007	83.7524	92.8033	81.9264	78.6797	83.3874	93.4109	85.0924	103.339
50 ug/ml	1.104	1.029	1.038	1.18	1.211	1.197	1.157	1.148	0.933	25 ug/ml		1.03033	0.955333	0.964333	1.10633	1.13733	1.12333	1.08333	1.07433	0.859333	97.1402	90.0691	90.9177	89.7998	92.316	91.1797	96.8992	96.0942	76.8634
0 ug/ml	1.143	1.146	1.114	1.372	1.232	1.313	1.193	1.242	1.14	0 ug/ml		1.06933	1.07233	1.04033	1.29833	1.15833	1.23933	1.11933	1.16833	1.06633	100.817	101.1	98.083	105.384	94.0206	100.595	100.119	104.502	95.3787
blank	0.074	0.072	0.075							blank			Avg 0	1.06067			1.232			1.118
			0.0736667							average blank =	0.0736667

## Sheet: n2
	OD504											OD540-blank									% cell viability
	CR04-WT			CR04-WT-NH2			CR04-CPP					CR04-WT			PE04-1(NH2)			PE04-2			PE04-1			PE04-1(NH2)			PE04-2
N1 (OD540)	1	2	3	4	5	6	7	8	9	N1 (OD540)		1	2	3	4	5	6	7	8	9	1	2	3	4	5	6	7	8	9
1000 ug/ml	0.483	0.502	0.472	0.302	0.356	0.334	0.165	0.177	0.118	800 ug/ml		0.412	0.431	0.401	0.231	0.285	0.263	0.094	0.106	0.047	42.7386	48.427	45.0562	27.007	33.3203	30.7482	12.0616	13.6014	6.0308
800 ug/ml	0.644	0.618	0.646	0.372	0.533	0.478	0.368	0.353	0.323	600 ug/ml		0.573	0.547	0.575	0.301	0.462	0.407	0.297	0.282	0.252	64.382	61.4607	64.6067	35.191	54.014	47.5838	38.1095	36.1848	32.3353
600 ug/ml	0.783	0.699	0.715	0.731	0.736	0.883	0.776	0.693	0.728	300 ug/ml		0.712	0.628	0.644	0.66	0.665	0.812	0.705	0.622	0.657	80	70.5618	72.3596	77.1629	77.7475	94.9337	90.4619	79.8118	84.3028
312.5 ug/ml	0.871	0.841	0.815	0.884	0.804	0.838	0.846	0.848	0.856	156.25 ug/ml		0.8	0.77	0.744	0.813	0.733	0.767	0.775	0.777	0.785	89.8876	86.5169	83.5955	95.0507	85.6976	89.6726	99.444	99.7006	100.727
150 ug/ml	0.936	0.898	0.917	1.009	0.815	0.925	0.956	0.881	0.821	50 ug/ml		0.865	0.827	0.846	0.938	0.744	0.854	0.885	0.81	0.75	97.191	92.9213	95.0562	109.665	86.9836	99.8441	113.559	103.935	96.2361
50 ug/ml	0.937	0.944	0.964	1.019	0.911	0.901	0.77	0.882	0.864	25 ug/ml		0.866	0.873	0.893	0.948	0.84	0.83	0.699	0.811	0.793	97.3034	98.0899	100.337	110.834	98.2073	97.0382	89.692	104.063	101.754
0 ug/ml	1.035	0.938	0.91	0.953	0.908	0.918	0.828	0.883	0.84	0 ug/ml		0.964	0.867	0.839	0.882	0.837	0.847	0.757	0.812	0.769	108.315	97.4157	94.2697	103.118	97.8566	99.0257	97.1343	104.192	98.6741
blank	0.077	0.069	0.067							blank				0.89			0.855333			0.779333
										average blank =	0.071

## Sheet: n3
	OD504											OD540-blank									% cell viability
	CR04-WT			CR04-WT-NH2			CR04-CPP					CR04-WT			PE04-1(NH2)			PE04-2			PE04-1			PE04-1(NH2)			PE04-2
N1 (OD540)	1	2	3	4	5	6	7	8	9	N1 (OD540)		1	2	3	4	5	6	7	8	9	1	2	3	4	5	6	7	8	9
1000 ug/ml	0.617	0.619	0.485	0.186	0.343	0.362	0.283	0.3	0.198	800 ug/ml		0.542	0.544	0.41	0.111	0.268	0.287	0.208	0.225	0.123	50.1388	51.6946	38.961	10.2619	24.7766	26.5331	17.4497	18.8758	10.3188
800 ug/ml	0.889	0.708	0.831	0.608	0.646	0.773	0.428	0.36	0.408	600 ug/ml		0.814	0.633	0.756	0.533	0.571	0.698	0.353	0.285	0.333	77.3519	60.152	71.8404	49.2758	52.7889	64.53	29.6141	23.9094	27.9362
600 ug/ml	0.859	0.904	0.951	0.766	1.007	0.916	0.993	0.86	0.877	300 ug/ml		0.784	0.829	0.876	0.691	0.932	0.841	0.918	0.785	0.802	74.5011	78.7773	83.2436	63.8829	86.1633	77.7504	77.0134	65.8557	67.2819
312.5 ug/ml	0.96	0.942	0.947	0.701	0.907	1.038	0.696	0.861	0.674	156.25 ug/ml		0.885	0.867	0.872	0.626	0.832	0.963	0.621	0.786	0.599	84.0988	82.3883	82.8635	57.8737	76.9183	89.0293	52.0973	65.9396	50.2517
150 ug/ml	0.963	0.952	0.848	0.933	0.992	0.868	1.034	1.05	0.872	50 ug/ml		0.888	0.877	0.773	0.858	0.917	0.793	0.959	0.975	0.797	84.3839	83.3386	73.4558	79.322	84.7766	73.3128	80.453	81.7953	66.8624
50 ug/ml	0.991	0.978	0.904	1.047	1.061	1.087	1.149	1.177	0.832	25 ug/ml		0.916	0.903	0.829	0.972	0.986	1.012	1.074	1.102	0.757	87.0447	85.8093	78.7773	89.8613	91.1556	93.5593	90.1007	92.4497	63.5067
0 ug/ml	1.156	1.135	1.091	0.931	1.338	1.201	1.495	1.337	0.969	0 ug/ml		1.081	1.06	1.016	0.856	1.263	1.126	1.42	1.262	0.894	102.724	100.729	96.5474	79.1371	116.764	104.099	119.128	105.872	75
blank	0.075	0.072	0.078							blank				1.05233			1.08167			1.192
										average blank =	0.075

## Sheet: average & sd
	N1									N2									N3									average % cell viability	sd	average % cell viability	sd	average % cell viability	sd
	PE04-1			PE04-1(NH2)			PE04-2			PE04-1			PE04-1(NH2)			PE04-2			PE04-1			PE04-1(NH2)			PE04-2
	1	2	3	4	5	6	7	8	9	1	2	3	4	5	6	7	8	9	1	2	3	4	5	6	7	8	9	CR04-WT		CR04-WT-NH2		CR04-CPP
	75.9663	59.5223	50.8485	30.3842	34.9297	41.4232	24.1801	13.5361	15.2355	42.7386	48.427	45.0562	27.007	33.3203	30.7482	12.0616	13.6014	6.0308	50.1388	51.6946	38.961	10.2619	24.7766	26.5331	17.4497	18.8758	10.3188	51.4837	10.8985	28.8205	8.60126	14.5878	5.23112
	82.3382	81.6782	79.9811	41.0173	52.2998	50.1894	34.5558	40.7275	32.6774	64.382	61.4607	64.6067	35.191	54.014	47.5838	38.1095	36.1848	32.3353	77.3519	60.152	71.8404	49.2758	52.7889	64.53	29.6141	23.9094	27.9362	71.5324	9.0491	49.6544	8.25849	32.8944	5.22703
	90.9177	90.0691	84.318	62.6082	66.7478	82.9816	56.2016	74.1801	49.9404	80	70.5618	72.3596	77.1629	77.7475	94.9337	90.4619	79.8118	84.3028	74.5011	78.7773	83.2436	63.8829	86.1633	77.7504	77.0134	65.8557	67.2819	80.5276	7.30097	76.6643	10.7575	71.6722	13.1262
	87.995	84.0352	89.5035	81.8452	79.5725	81.6829	81.8724	86.4341	80.2624	89.8876	86.5169	83.5955	95.0507	85.6976	89.6726	99.444	99.7006	100.727	84.0988	82.3883	82.8635	57.8737	76.9183	89.0293	52.0973	65.9396	50.2517	85.6538	2.88736	81.927	10.6428	79.6366	19.6875
	87.9007	83.7524	92.8033	81.9264	78.6797	83.3874	93.4109	85.0924	103.339	97.191	92.9213	95.0562	109.665	86.9836	99.8441	113.559	103.935	96.2361	84.3839	83.3386	73.4558	79.322	84.7766	73.3128	80.453	81.7953	66.8624	87.867	7.46481	86.4331	11.3745	91.6314	14.4551
	97.1402	90.0691	90.9177	89.7998	92.316	91.1797	96.8992	96.0942	76.8634	97.3034	98.0899	100.337	110.834	98.2073	97.0382	89.692	104.063	101.754	87.0447	85.8093	78.7773	89.8613	91.1556	93.5593	90.1007	92.4497	63.5067	91.721	7.09805	94.8835	6.68146	90.1581	12.7525
	100.817	101.1	98.083	105.384	94.0206	100.595	100.119	104.502	95.3787	108.315	97.4157	94.2697	103.118	97.8566	99.0257	97.1343	104.192	98.6741	102.724	100.729	96.5474	79.1371	116.764	104.099	119.128	105.872	75	100	4.09379	100	10.0838	100	11.6968
	PE04-1												PE04-1
	1	2	3	4	5	6	7	8	9	Avg	SD		N1	N2	N3
1000 ug/ml	75.9663	59.5223	50.8485	42.7386	48.427	45.0562	50.1388	51.6946	38.961	51.4837	10.8985		62.1124	45.4072	46.9315
800 ug/ml	82.3382	81.6782	79.9811	64.382	61.4607	64.6067	77.3519	60.152	71.8404	71.5324	9.0491		81.3325	63.4831	69.7814
600 ug/ml	90.9177	90.0691	84.318	80	70.5618	72.3596	74.5011	78.7773	83.2436	80.5276	7.30097		88.4349	74.3071	78.8407
312.5 ug/ml	87.995	84.0352	89.5035	89.8876	86.5169	83.5955	84.0988	82.3883	82.8635	85.6538	2.88736		87.1779	86.6667	83.1169
150 ug/ml	87.9007	83.7524	92.8033	97.191	92.9213	95.0562	84.3839	83.3386	73.4558	87.867	7.46481		88.1521	95.0562	80.3928
50 ug/ml	97.1402	90.0691	90.9177	97.3034	98.0899	100.337	87.0447	85.8093	78.7773	91.721	7.09805		92.709	98.5768	83.8771
0 ug/ml	100.817	101.1	98.083	108.315	97.4157	94.2697	102.724	100.729	96.5474	100	4.09379		100	100	100
	PE04-1(NH2)												PE04-1(NH2)
	1	2	3	4	5	6	7	8	9	Avg	SD		N1	N2	N3
800 ug/ml	30.3842	34.9297	41.4232	27.007	33.3203	30.7482	10.2619	24.7766	26.5331	28.8205	8.60126		35.579	30.3585	20.5239		35.579						100	91.0985	81.3312	81.0335	70.7792	47.8355	35.579
600 ug/ml	41.0173	52.2998	50.1894	35.191	54.014	47.5838	49.2758	52.7889	64.53	49.6544	8.25849		47.8355	45.5963	55.5316		30.3585						100	102.027	98.8309	90.1403	83.2814	45.5963	30.3585
300 ug/ml	62.6082	66.7478	82.9816	77.1629	77.7475	94.9337	63.8829	86.1633	77.7504	76.6643	10.7575		70.7792	83.2814	75.9322		20.5239						100	91.5254	79.1371	74.6071	75.9322	55.5316	20.5239
156.25 ug/ml	81.8452	79.5725	81.6829	95.0507	85.6976	89.6726	57.8737	76.9183	89.0293	81.927	10.6428		81.0335	90.1403	74.6071
50 ug/ml	81.9264	78.6797	83.3874	109.665	86.9836	99.8441	79.322	84.7766	73.3128	86.4331	11.3745		81.3312	98.8309	79.1371
25 ug/ml	89.7998	92.316	91.1797	110.834	98.2073	97.0382	89.8613	91.1556	93.5593	94.8835	6.68146		91.0985	102.027	91.5254
0 ug/ml	105.384	94.0206	100.595	103.118	97.8566	99.0257	79.1371	116.764	104.099	100	10.0838		100	100	100
	PE04-2
	1	2	3	4	5	6	7	8	9	Avg	SD
800 ug/ml	24.1801	13.5361	15.2355	12.0616	13.6014	6.0308	17.4497	18.8758	10.3188	14.5878	5.23112		17.6506	10.5646	15.5481		17.6506	35.9869	60.1073	82.8563			100	89.9523	93.9475	82.8563	60.1073	35.9869	17.6506
600 ug/ml	34.5558	40.7275	32.6774	38.1095	36.1848	32.3353	29.6141	23.9094	27.9362	32.8944	5.22703		35.9869	35.5432	27.1532		10.5646	35.5432	84.8589	99.9572			100	98.503	104.577	99.9572	84.8589	35.5432	10.5646
300 ug/ml	56.2016	74.1801	49.9404	90.4619	79.8118	84.3028	77.0134	65.8557	67.2819	71.6722	13.1262		60.1073	84.8589	70.0503		15.5481	27.1532	70.0503	56.0962			100	82.019	76.3702	56.0962	70.0503	27.1532	15.5481
156.25 ug/ml	81.8724	86.4341	80.2624	99.444	99.7006	100.727	52.0973	65.9396	50.2517	79.6366	19.6875		82.8563	99.9572	56.0962
50 ug/ml	93.4109	85.0924	103.339	113.559	103.935	96.2361	80.453	81.7953	66.8624	91.6314	14.4551		93.9475	104.577	76.3702
25 ug/ml	96.8992	96.0942	76.8634	89.692	104.063	101.754	90.1007	92.4497	63.5067	90.1581	12.7525		89.9523	98.503	82.019
0 ug/ml	100.119	104.502	95.3787	97.1343	104.192	98.6741	119.128	105.872	75	100	11.6968		100	100	100

## Sheet: Stat PE04-1 
Number of families	1
Number of comparisons per family	21
Alpha	0.05
Tukey's multiple comparisons test	Mean Diff.	95.00% CI of diff.	Below threshold?	Summary
Control vs. 50	8.279	-10.94 to 27.50	No	ns		A-B
Control vs. 150	12.13	-7.091 to 31.36	No	ns		A-C
Control vs. 312.5	14.35	-4.878 to 33.57	No	ns		A-D
Control vs. 600	19.47	0.2487 to 38.70	Yes	*		A-E
Control vs. 800	28.47	9.244 to 47.69	Yes	**		A-F
Control vs. 1000	48.53	29.31 to 67.76	Yes	****		A-G
50 vs. 150	3.854	-15.37 to 23.08	No	ns		B-C
50 vs. 312.5	6.067	-13.16 to 25.29	No	ns		B-D
50 vs. 600	11.19	-8.030 to 30.42	No	ns		B-E
50 vs. 800	20.19	0.9648 to 39.41	Yes	*		B-F
50 vs. 1000	40.25	21.03 to 59.48	Yes	****		B-G
150 vs. 312.5	2.213	-17.01 to 21.44	No	ns		C-D
150 vs. 600	7.339	-11.88 to 26.56	No	ns		C-E
150 vs. 800	16.33	-2.889 to 35.56	No	ns		C-F
150 vs. 1000	36.4	17.18 to 55.62	Yes	***		C-G
312.5 vs. 600	5.126	-14.10 to 24.35	No	ns		D-E
312.5 vs. 800	14.12	-5.102 to 33.35	No	ns		D-F
312.5 vs. 1000	34.19	14.96 to 53.41	Yes	***		D-G
600 vs. 800	8.995	-10.23 to 28.22	No	ns		E-F
600 vs. 1000	29.06	9.837 to 48.28	Yes	**		E-G
800 vs. 1000	20.07	0.8419 to 39.29	Yes	*		F-G
Test details	Mean 1	Mean 2	Mean Diff.	SE of diff.	n1	n2	q	DF
Control vs. 50	100	91.72	8.279	5.63	3	3	2.08	14
Control vs. 150	100	87.87	12.13	5.63	3	3	3.048	14
Control vs. 312.5	100	85.65	14.35	5.63	3	3	3.604	14
Control vs. 600	100	80.53	19.47	5.63	3	3	4.891	14
Control vs. 800	100	71.53	28.47	5.63	3	3	7.151	14
Control vs. 1000	100	51.47	48.53	5.63	3	3	12.19	14
50 vs. 150	91.72	87.87	3.854	5.63	3	3	0.9681	14
50 vs. 312.5	91.72	85.65	6.067	5.63	3	3	1.524	14
50 vs. 600	91.72	80.53	11.19	5.63	3	3	2.812	14
50 vs. 800	91.72	71.53	20.19	5.63	3	3	5.071	14
50 vs. 1000	91.72	51.47	40.25	5.63	3	3	10.11	14
150 vs. 312.5	87.87	85.65	2.213	5.63	3	3	0.556	14
150 vs. 600	87.87	80.53	7.339	5.63	3	3	1.844	14
150 vs. 800	87.87	71.53	16.33	5.63	3	3	4.103	14
150 vs. 1000	87.87	51.47	36.4	5.63	3	3	9.144	14
312.5 vs. 600	85.65	80.53	5.126	5.63	3	3	1.288	14
312.5 vs. 800	85.65	71.53	14.12	5.63	3	3	3.547	14
312.5 vs. 1000	85.65	51.47	34.19	5.63	3	3	8.588	14
600 vs. 800	80.53	71.53	8.995	5.63	3	3	2.26	14
600 vs. 1000	80.53	51.47	29.06	5.63	3	3	7.3	14
800 vs. 1000	71.53	51.47	20.07	5.63	3	3	5.04	14

## Sheet: Stat PE04-1(NH2)
Number of families	1
Number of comparisons per family	21
Alpha	0.05
Tukey's multiple comparisons test	Mean Diff.	95.00% CI of diff.	Below threshold?	Summary
Control vs. 25	5.117	-14.35 to 24.58	No	ns		A-B
Control vs. 50	13.57	-5.898 to 33.03	No	ns		A-C
Control vs. 156.25	18.07	-1.392 to 37.54	No	ns		A-D
Control vs. 300	23.34	3.871 to 42.80	Yes	*		A-E
Control vs. 600	50.35	30.88 to 69.81	Yes	****		A-F
Control vs. 800	71.17	51.70 to 90.63	Yes	****		A-G
25 vs. 50	8.45	-11.01 to 27.91	No	ns		B-C
25 vs. 156.25	12.96	-6.508 to 32.42	No	ns		B-D
25 vs. 300	18.22	-1.245 to 37.68	No	ns		B-E
25 vs. 600	45.23	25.76 to 64.69	Yes	****		B-F
25 vs. 800	66.05	46.59 to 85.51	Yes	****		B-G
50 vs. 156.25	4.506	-14.96 to 23.97	No	ns		C-D
50 vs. 300	9.769	-9.696 to 29.23	No	ns		C-E
50 vs. 600	36.78	17.31 to 56.24	Yes	***		C-F
50 vs. 800	57.6	38.14 to 77.06	Yes	****		C-G
156.25 vs. 300	5.263	-14.20 to 24.73	No	ns		D-E
156.25 vs. 600	32.27	12.81 to 51.74	Yes	***		D-F
156.25 vs. 800	53.09	33.63 to 72.56	Yes	****		D-G
300 vs. 600	27.01	7.545 to 46.47	Yes	**		E-F
300 vs. 800	47.83	28.37 to 67.30	Yes	****		E-G
600 vs. 800	20.82	1.357 to 40.29	Yes	*		F-G
Test details	Mean 1	Mean 2	Mean Diff.	SE of diff.	n1	n2	q	DF
Control vs. 25	100	94.88	5.117	5.7	3	3	1.269	14
Control vs. 50	100	86.43	13.57	5.7	3	3	3.366	14
Control vs. 156.25	100	81.93	18.07	5.7	3	3	4.484	14
Control vs. 300	100	76.66	23.34	5.7	3	3	5.789	14
Control vs. 600	100	49.65	50.35	5.7	3	3	12.49	14
Control vs. 800	100	28.83	71.17	5.7	3	3	17.66	14
25 vs. 50	94.88	86.43	8.45	5.7	3	3	2.096	14
25 vs. 156.25	94.88	81.93	12.96	5.7	3	3	3.214	14
25 vs. 300	94.88	76.66	18.22	5.7	3	3	4.52	14
25 vs. 600	94.88	49.65	45.23	5.7	3	3	11.22	14
25 vs. 800	94.88	28.83	66.05	5.7	3	3	16.39	14
50 vs. 156.25	86.43	81.93	4.506	5.7	3	3	1.118	14
50 vs. 300	86.43	76.66	9.769	5.7	3	3	2.424	14
50 vs. 600	86.43	49.65	36.78	5.7	3	3	9.124	14
50 vs. 800	86.43	28.83	57.6	5.7	3	3	14.29	14
156.25 vs. 300	81.93	76.66	5.263	5.7	3	3	1.306	14
156.25 vs. 600	81.93	49.65	32.27	5.7	3	3	8.006	14
156.25 vs. 800	81.93	28.83	53.09	5.7	3	3	13.17	14
300 vs. 600	76.66	49.65	27.01	5.7	3	3	6.701	14
300 vs. 800	76.66	28.83	47.83	5.7	3	3	11.87	14
600 vs. 800	49.65	28.83	20.82	5.7	3	3	5.166	14

## Sheet: Stat PE04-2
Number of families	1
Number of comparisons per family	21
Alpha	0.05
Tukey's multiple comparisons test	Mean Diff.	95.00% CI of diff.	Below threshold?	Summary
Control vs. 25	9.842	-22.68 to 42.37	No	ns		A-B
Control vs. 50	8.369	-24.16 to 40.89	No	ns		A-C
Control vs. 156.25	20.36	-12.16 to 52.89	No	ns		A-D
Control vs. 300	28.33	-4.198 to 60.85	No	ns		A-E
Control vs. 600	67.11	34.58 to 99.63	Yes	****		A-F
Control vs. 800	85.4	52.87 to 117.9	Yes	****		A-G
25 vs. 50	-1.473	-34.00 to 31.05	No	ns		B-C
25 vs. 156.25	10.52	-22.00 to 43.05	No	ns		B-D
25 vs. 300	18.49	-14.04 to 51.01	No	ns		B-E
25 vs. 600	57.26	24.74 to 89.79	Yes	***		B-F
25 vs. 800	75.56	43.03 to 108.1	Yes	****		B-G
50 vs. 156.25	11.99	-20.53 to 44.52	No	ns		C-D
50 vs. 300	19.96	-12.57 to 52.48	No	ns		C-E
50 vs. 600	58.74	26.21 to 91.26	Yes	***		C-F
50 vs. 800	77.03	44.51 to 109.6	Yes	****		C-G
156.25 vs. 300	7.964	-24.56 to 40.49	No	ns		D-E
156.25 vs. 600	46.74	14.22 to 79.27	Yes	**		D-F
156.25 vs. 800	65.04	32.51 to 97.56	Yes	***		D-G
300 vs. 600	38.78	6.252 to 71.30	Yes	*		E-F
300 vs. 800	57.07	24.55 to 89.60	Yes	***		E-G
600 vs. 800	18.29	-14.23 to 50.82	No	ns		F-G
Test details	Mean 1	Mean 2	Mean Diff.	SE of diff.	n1	n2	q	DF
Control vs. 25	100	90.16	9.842	9.526	3	3	1.461	14
Control vs. 50	100	91.63	8.369	9.526	3	3	1.242	14
Control vs. 156.25	100	79.64	20.36	9.526	3	3	3.023	14
Control vs. 300	100	71.67	28.33	9.526	3	3	4.206	14
Control vs. 600	100	32.89	67.11	9.526	3	3	9.963	14
Control vs. 800	100	14.6	85.4	9.526	3	3	12.68	14
25 vs. 50	90.16	91.63	-1.473	9.526	3	3	0.2187	14
25 vs. 156.25	90.16	79.64	10.52	9.526	3	3	1.562	14
25 vs. 300	90.16	71.67	18.49	9.526	3	3	2.745	14
25 vs. 600	90.16	32.89	57.26	9.526	3	3	8.502	14
25 vs. 800	90.16	14.6	75.56	9.526	3	3	11.22	14
50 vs. 156.25	91.63	79.64	11.99	9.526	3	3	1.781	14
50 vs. 300	91.63	71.67	19.96	9.526	3	3	2.963	14
50 vs. 600	91.63	32.89	58.74	9.526	3	3	8.72	14
50 vs. 800	91.63	14.6	77.03	9.526	3	3	11.44	14
156.25 vs. 300	79.64	71.67	7.964	9.526	3	3	1.182	14
156.25 vs. 600	79.64	32.89	46.74	9.526	3	3	6.94	14
156.25 vs. 800	79.64	14.6	65.04	9.526	3	3	9.656	14
300 vs. 600	71.67	32.89	38.78	9.526	3	3	5.757	14
300 vs. 800	71.67	14.6	57.07	9.526	3	3	8.473	14
600 vs. 800	32.89	14.6	18.29	9.526	3	3	2.716	14
