# Supplementary material for: Antimicrobial activity and synergistic effect of phage-encoded antimicrobial peptides with colistin and outer membrane permeabilizing agents against Acinetobacter baumannii
Source: PeerJ. 2024 Dec 24;12:e18722. doi: 10.7717/peerj.18722 (PMC11674141; doi:10.7717/peerj.18722)
Supplement: Supplemental Information 4 — Biofilms of A. baumanni (A) Data represented percentage of biofilm reduction calculated based on the treated wells with PE04-1 (blue), PE04-1(NH2) (brown), and PE04-2 peptides (grey) versus control wells against 20 representative A. baumannii strains. The A. baumannii strains were MDR-AB, XDR-AB, CR-AB, and colistin resistant strains. Data are expressed as the mean of three independent experiments ± SD. (B) Data represented comparisons of biofilm reduction ability of PE04-1, PE04-1(NH2), and PE04-2 peptides. [file peerj-12-18722-s004.xlsx]

## Sheet: CR04-WT
	treated with CR04-WT			average OD	only AB			average OD		OD treated well - blank			OD control - blank			% Inhibition
AB134	0.538	0.585	0.668	0.597	2.248	1.642	1.924	1.938		0.450333			1.79133			74.8604
AB329	0.313	0.299	0.267	0.293	0.542	0.575	0.487	0.534667		0.146333			0.388			62.2852
CR65-40	0.955	0.824	0.81	0.863	1.026	1.281	1.052	1.11967		0.716333			0.973			26.3789
CR65-47	0.951	0.81	0.78	0.847	1.159	2.241	2.496	1.96533		0.700333			1.81867			61.4919
CR65-51	0.606	0.578	0.286	0.49	1.308	2.007	1.417	1.57733		0.343333			1.43067			76.0019
CR65-55	0.913	0.469	0.898	0.76	1.468	1.568	1.179	1.405		0.613333			1.25833			51.2583
CR65-71	0.913	1.017	0.944	0.958	1.143	1.305	0.974	1.14067		0.811333			0.994			18.3769
AB20	0.675	0.494	0.485	0.551333	1.615	1.292	1.77	1.559		0.404667			1.41233			71.3477
AB21	0.609	0.628	0.63	0.622333	0.885	0.995	0.978	0.952667		0.475667			0.806			40.9843
AB57	0.572	0.739	0.77	0.693667	0.857	0.893	1	0.916667		0.547			0.77			28.961
AB143	0.594	0.666	0.65	0.636667	0.998	0.721	1.099	0.939333		0.49			0.792667			38.1833
CR65-74	0.557	0.476	0.446	0.493	0.683	0.665	0.729	0.692333		0.346333			0.545667			36.5302
CR65-43	0.239	0.303	0.376	0.306	0.576	0.752	0.747	0.691667		0.159333			0.545			70.7645
AB23	0.17	0.209	0.246	0.208333	0.612	0.9	1.272	0.928		0.0616667			0.781333			92.1075
AB59	0.219	0.278	0.255	0.250667	0.624	0.977	1.269	0.956667		0.104			0.81			87.1605
AB72	0.328	0.394	0.432	0.384667	0.593	0.603	1.092	0.762667		0.238			0.616			61.3636
AB152	0.263	0.385	0.409	0.352333	0.59	0.701	0.765	0.685333		0.205667			0.538667			61.8193
AB175	0.55	0.553	0.624	0.575667	0.9	0.844	1.003	0.915667		0.429			0.769			44.2133
AB236	0.278	0.221	0.248	0.249	0.613	0.87	1.138	0.873667		0.102333			0.727			85.9239
AB263	1.034	1.14	1.243	1.139	3.971	3.501	3.739	3.737		0.992333			3.59033			72.361
blank	0.15	0.155	0.135
average blank	0.146667

## Sheet: CR04-WT-NH2
	treated with CR04-WT-NH2			average OD	only AB			average OD		OD treated well - blank			OD control - blank			% Inhibition
AB134	0.149	0.217	0.348	0.238	1.43	1.682	1.609	1.57367		0.091			1.42667			93.6215
AB329	0.597	0.48	0.541	0.539333	0.78	0.911	0.726	0.805667		0.392333			0.658667			40.4352
CR65-40	0.785	0.655	0.756	0.732	1.073	1.196	1.455	1.24133		0.585			1.09433			46.5428
CR65-47	0.391	0.434	0.538	0.454333	3.264	2.825	2.352	2.81367		0.307333			2.66667			88.475
CR65-51	0.202	0.367	0.23	0.266333	0.875	1.095	1.022	0.997333		0.119333			0.850333			85.9663
CR65-55	0.274	0.205	0.425	0.301333	2.38	1.5	1.983	1.95433		0.154333			1.80733			91.4607
CR65-71	0.507	0.64	0.67	0.605667	1.275	0.989	1.066	1.11		0.458667			0.963			52.3711
AB20	0.326	0.582	0.46	0.456	0.68	1.092	1.267	1.013		0.309			0.866			64.3187
AB21	0.175	0.458	0.191	0.274667	0.555	0.563	0.648	0.588667		0.127667			0.441667			71.0943
AB57	0.229	0.233	0.422	0.294667	0.461	0.412	0.612	0.495		0.147667			0.348			57.567
AB143	0.33	0.252	0.318	0.3	0.65	0.745	0.778	0.724333		0.153			0.577333			73.4988
CR65-74	0.163	0.158	0.15	0.157	0.733	0.695	0.74	0.722667		0.01			0.575667			98.2629
CR65-43	0.256	0.288	0.299	0.281	0.671	0.686	0.672	0.676333		0.134			0.529333			74.6851
AB23	0.159	0.15	0.215	0.174667	1.369	1.486	1.228	1.361		0.0276667			1.214			97.721
AB59	0.216	0.165	0.159	0.18	1.64	1.426	1.393	1.48633		0.033			1.33933			97.5361
AB72	0.42	0.437	0.495	0.450667	0.888	1.112	0.937	0.979		0.303667			0.832			63.5016
AB152	0.44	0.337	0.31	0.362333	0.646	0.653	0.906	0.735		0.215333			0.588			63.3787
AB175	0.294	0.425	0.196	0.305	0.632	0.63	0.84	0.700667		0.158			0.553667			71.463
AB236	0.261	0.145	0.235	0.213667	0.835	0.654	0.721	0.736667		0.0666667			0.589667			88.6942
AB263	0.486	0.477	0.474	0.479	3.591	3.601	2.892	3.36133		0.332			3.21433			89.6713
blank	0.14	0.156	0.145
average blank	0.147

## Sheet: CR04-CPP
	treated with CR04-CPP			average OD	only AB			average OD		OD treated well - blank			OD control - blank			% Inhibition
AB134	0.193	0.225	0.233	0.217	1.066	0.791	1.384	1.08033		0.071			0.934333			92.401
AB329	0.272	0.184	0.154	0.203333	0.531	0.363	0.658	0.517333		0.0573333			0.371333			84.5601
CR65-40	0.251	0.395	0.243	0.296333	1.132	0.975	1.286	1.131		0.150333			0.985			84.7377
CR65-47	0.151	0.27	0.425	0.282	1.159	2.071	1.51	1.58		0.136			1.434			90.516
CR65-51	0.159	0.162	0.186	0.169	0.445	0.659	0.736	0.613333		0.023			0.467333			95.0785
CR65-55	0.141	0.186	0.135	0.154	2.307	3.735	2.695	2.91233		0.008			2.76633			99.7108
CR65-71	0.153	0.204	0.152	0.169667	1.601	1.895	1.73	1.742		0.0236667			1.596			98.5171
AB20	0.18	0.199	0.377	0.252	1.3	1.687	1.591	1.526		0.106			1.38			92.3188
AB21	0.177	0.215	0.199	0.197	0.845	0.754	0.828	0.809		0.051			0.663			92.3077
AB57	0.205	0.192	0.162	0.186333	0.518	0.699	0.806	0.674333		0.0403333			0.528333			92.3659
AB143	0.241	0.179	0.19	0.203333	0.693	0.731	0.867	0.763667		0.0573333			0.617667			90.7178
CR65-74	0.165	0.159	0.145	0.156333	0.566	0.508	0.559	0.544333		0.0103333			0.398333			97.4059
CR65-43	0.33	0.376	0.252	0.319333	0.473	0.543	0.544	0.52		0.173333			0.374			53.6542
AB23	0.167	0.16	0.163	0.163333	0.434	0.515	0.508	0.485667		0.0173333			0.339667			94.897
AB59	0.159	0.181	0.177	0.172333	0.85	1.011	1.351	1.07067		0.0263333			0.924667			97.1521
AB72	0.159	0.163	0.164	0.162	0.792	0.85	0.748	0.796667		0.016			0.650667			97.541
AB152	0.164	0.15	0.154	0.156	0.704	0.666	0.762	0.710667		0.01			0.564667			98.229
AB175	0.163	0.158	0.161	0.160667	0.986	1.047	0.825	0.952667		0.0146667			0.806667			98.1818
AB236	0.149	0.152	0.144	0.148333	1.181	0.673	0.721	0.858333		0.00233333			0.712333			99.6724
AB263	0.495	0.553	0.476	0.508	3.381	3.521	2.929	3.277		0.362			3.131			88.4382
blank	0.145	0.156	0.137
average blank	0.146

## Sheet: รวม %inhibition
	PE04-1		PE04-1(NH2)	PE04-2
AB134	74.8604		93.6215	92.401
AB329	62.2852		40.4352	84.5601
CR65-40	26.3789		46.5428	84.7377
CR65-47	61.4919		88.475	90.516
CR65-51	76.0019		85.9663	95.0785
CR65-55	51.2583		91.4607	99.7108
CR65-71	18.3769		52.3711	98.5171
AB20	71.3477		64.3187	92.3188
AB21	40.9843		71.0943	92.3077
AB57	28.961		57.567	92.3659
AB143	38.1833		73.4988	90.7178
CR65-74	36.5302		98.2629	97.4059
CR65-43	70.7645		74.6851	53.6542
AB23	92.1075		97.721	94.897
AB59	87.1605		97.5361	97.1521
AB72	61.3636		63.5016	97.541
AB152	61.8193		63.3787	98.229
AB175	44.2133		71.463	98.1818
AB236	85.9239		88.6942	99.6724
AB263	72.361		89.6713	88.4382
