# Supplementary material for: Antimicrobial activity and synergistic effect of phage-encoded antimicrobial peptides with colistin and outer membrane permeabilizing agents against Acinetobacter baumannii
Source: PeerJ. 2024 Dec 24;12:e18722. doi: 10.7717/peerj.18722 (PMC11674141; doi:10.7717/peerj.18722)
Supplement: Supplemental Information 5 — The survival rates of the larvae in the different treatment groups were monitored for 10 days. The plotted points represent mortality events of PBS (control), ATCC19606 (positive control), and AB329 mix with peptides (PE04-1, PE04-1(NH2), PE04-2). All experimental groups were performed in triplicate. [file peerj-12-18722-s005.xlsx]

## Sheet: ATCC Group 1
	not injection	only PBS	only	only	only	only ATCC19606	PE04-1	PE04-1(NH2)	PE04-2	Post treatment	Post treatment	Post treatment
DAY			PE04-1	PE04-1(NH2)	PE04-2	10^8	with ATCC19606	with ATCC19606	with ATCC19606
1	10	10	10	10	10	10	10	10	10
2	10	10	10	10	10	9	9	10	10
3	10	10	10	10	10	6	9	10	10
4	10	10	10	10	10	6	9	9	10
5	10	10	10	10	10	4	9	9	10
6	10	10	10	10	10	4	9	9	10
7	10	10	10	10	10	4	9	9	10
8	10	10	10	10	10	3	9	9	10
9	10	10	10	10	10	3	9	9	10
10	10	10	10	10	10	3	9	9	10

## Sheet: ATCC Group 2
	not injection	only PBS	only	only	only	only ATCC19606	PE04-1	PE04-1(NH2)	PE04-2
DAY			PE04-1	PE04-1(NH2)	PE04-2	10^8	with ATCC19606	with ATCC19606	with ATCC19606
1	10	10	10	10	10	9	10	10	10
2	10	10	10	10	10	9	10	10	10
3	10	10	10	10	10	9	10	10	10
4	10	10	10	10	10	6	9	10	10
5	10	10	10	10	10	5	9	10	10
6	10	10	10	10	10	5	9	10	10
7	10	10	10	10	10	5	9	9	10
8	10	10	10	10	10	4	8	9	9
9	10	10	10	10	10	4	8	9	9
10	10	10	10	10	10	4	8	9	9

## Sheet: ATCC Group 3
	not injection	only PBS	only	only	only	only ATCC19606	PE04-1	PE04-1(NH2)	PE04-2	Post treatment	Post treatment	Post treatment
DAY			PE04-1	PE04-1(NH2)	PE04-2	10^8	with ATCC19606	with ATCC19606	with ATCC19606
1	10	10	10	10	10	10	10	10	10
2	10	10	10	10	10	8	10	10	10
3	10	10	10	10	10	8	10	10	10
4	10	10	10	10	10	8	9	10	10
5	10	10	10	10	10	5	9	10	10
6	10	10	10	10	10	5	9	10	10
7	10	10	10	10	10	5	9	9	10
8	10	10	10	10	10	5	8	9	9
9	10	10	10	10	10	4	8	9	9
10	10	10	10	10	10	4	8	9	9

## Sheet: data
gr	exp	day	survive	death	censor
1	1	1	10	0	0
1	1	2	10	0	0
1	1	3	10	0	0
1	1	4	10	0	0
1	1	5	10	0	0
1	1	6	10	0	0
1	1	7	10	0	0
1	1	8	10	0	0
1	1	9	10	0	0
1	1	10	10	0	10
2	1	1	10	0	0
2	1	2	10	0	0
2	1	3	10	0	0
2	1	4	10	0	0
2	1	5	10	0	0
2	1	6	10	0	0
2	1	7	10	0	0
2	1	8	10	0	0
2	1	9	10	0	0
2	1	10	10	0	10
3	1	1	10	0	0
3	1	2	10	0	0
3	1	3	10	0	0
3	1	4	10	0	0
3	1	5	10	0	0
3	1	6	10	0	0
3	1	7	10	0	0
3	1	8	10	0	0
3	1	9	10	0	0
3	1	10	10	0	10
4	1	1	10	0	0
4	1	2	10	0	0
4	1	3	10	0	0
4	1	4	10	0	0
4	1	5	10	0	0
4	1	6	10	0	0
4	1	7	10	0	0
4	1	8	10	0	0
4	1	9	10	0	0
4	1	10	10	0	10
5	1	1	10	0	0
5	1	2	10	0	0
5	1	3	10	0	0
5	1	4	10	0	0
5	1	5	10	0	0
5	1	6	10	0	0
5	1	7	10	0	0
5	1	8	10	0	0
5	1	9	10	0	0
5	1	10	10	0	10
6	1	1	10	0	0
6	1	2	9	1	0
6	1	3	6	3	0
6	1	4	6	0	0
6	1	5	4	2	0
6	1	6	4	0	0
6	1	7	4	0	0
6	1	8	3	1	0
6	1	9	3	0	0
6	1	10	3	0	3
7	1	1	10	0	0
7	1	2	9	1	0
7	1	3	9	0	0
7	1	4	9	0	0
7	1	5	9	0	0
7	1	6	9	0	0
7	1	7	9	0	0
7	1	8	9	0	0
7	1	9	9	0	0
7	1	10	9	0	9
8	1	1	10	0	0
8	1	2	10	0	0
8	1	3	10	0	0
8	1	4	9	1	0
8	1	5	9	0	0
8	1	6	9	0	0
8	1	7	9	0	0
8	1	8	9	0	0
8	1	9	9	0	0
8	1	10	9	0	9
9	1	1	10	0	0
9	1	2	10	0	0
9	1	3	10	0	0
9	1	4	10	0	0
9	1	5	10	0	0
9	1	6	10	0	0
9	1	7	10	0	0
9	1	8	10	0	0
9	1	9	10	0	0
9	1	10	10	0	10
1	2	1	10	0	0
1	2	2	10	0	0
1	2	3	10	0	0
1	2	4	10	0	0
1	2	5	10	0	0
1	2	6	10	0	0
1	2	7	10	0	0
1	2	8	10	0	0
1	2	9	10	0	0
1	2	10	10	0	10
2	2	1	10	0	0
2	2	2	10	0	0
2	2	3	10	0	0
2	2	4	10	0	0
2	2	5	10	0	0
2	2	6	10	0	0
2	2	7	10	0	0
2	2	8	10	0	0
2	2	9	10	0	0
2	2	10	10	0	10
3	2	1	10	0	0
3	2	2	10	0	0
3	2	3	10	0	0
3	2	4	10	0	0
3	2	5	10	0	0
3	2	6	10	0	0
3	2	7	10	0	0
3	2	8	10	0	0
3	2	9	10	0	0
3	2	10	10	0	10
4	2	1	10	0	0
4	2	2	10	0	0
4	2	3	10	0	0
4	2	4	10	0	0
4	2	5	10	0	0
4	2	6	10	0	0
4	2	7	10	0	0
4	2	8	10	0	0
4	2	9	10	0	0
4	2	10	10	0	10
5	2	1	10	0	0
5	2	2	10	0	0
5	2	3	10	0	0
5	2	4	10	0	0
5	2	5	10	0	0
5	2	6	10	0	0
5	2	7	10	0	0
5	2	8	10	0	0
5	2	9	10	0	0
5	2	10	10	0	10
6	2	1	9	1	0
6	2	2	9	0	0
6	2	3	9	0	0
6	2	4	6	3	0
6	2	5	5	1	0
6	2	6	5	0	0
6	2	7	5	0	0
6	2	8	4	1	0
6	2	9	4	0	0
6	2	10	4	0	4
7	2	1	10	0	0
7	2	2	10	0	0
7	2	3	10	0	0
7	2	4	9	1	0
7	2	5	9	0	0
7	2	6	9	0	0
7	2	7	9	0	0
7	2	8	8	1	0
7	2	9	8	0	0
7	2	10	8	0	8
8	2	1	10	0	0
8	2	2	10	0	0
8	2	3	10	0	0
8	2	4	10	0	0
8	2	5	10	0	0
8	2	6	10	0	0
8	2	7	9	1	0
8	2	8	9	0	0
8	2	9	9	0	0
8	2	10	9	0	9
9	2	1	10	0	0
9	2	2	10	0	0
9	2	3	10	0	0
9	2	4	10	0	0
9	2	5	10	0	0
9	2	6	10	0	0
9	2	7	10	0	0
9	2	8	9	1	0
9	2	9	9	0	0
9	2	10	9	0	9
1	3	1	10	0	0
1	3	2	10	0	0
1	3	3	10	0	0
1	3	4	10	0	0
1	3	5	10	0	0
1	3	6	10	0	0
1	3	7	10	0	0
1	3	8	10	0	0
1	3	9	10	0	0
1	3	10	10	0	10
2	3	1	10	0	0
2	3	2	10	0	0
2	3	3	10	0	0
2	3	4	10	0	0
2	3	5	10	0	0
2	3	6	10	0	0
2	3	7	10	0	0
2	3	8	10	0	0
2	3	9	10	0	0
2	3	10	10	0	10
3	3	1	10	0	0
3	3	2	10	0	0
3	3	3	10	0	0
3	3	4	10	0	0
3	3	5	10	0	0
3	3	6	10	0	0
3	3	7	10	0	0
3	3	8	10	0	0
3	3	9	10	0	0
3	3	10	10	0	10
4	3	1	10	0	0
4	3	2	10	0	0
4	3	3	10	0	0
4	3	4	10	0	0
4	3	5	10	0	0
4	3	6	10	0	0
4	3	7	10	0	0
4	3	8	10	0	0
4	3	9	10	0	0
4	3	10	10	0	10
5	3	1	10	0	0
5	3	2	10	0	0
5	3	3	10	0	0
5	3	4	10	0	0
5	3	5	10	0	0
5	3	6	10	0	0
5	3	7	10	0	0
5	3	8	10	0	0
5	3	9	10	0	0
5	3	10	10	0	10
6	3	1	10	0	0
6	3	2	8	2	0
6	3	3	8	0	0
6	3	4	8	0	0
6	3	5	5	3	0
6	3	6	5	0	0
6	3	7	5	0	0
6	3	8	5	0	0
6	3	9	4	1	0
6	3	10	4	0	4
7	3	1	10	0	0
7	3	2	10	0	0
7	3	3	10	0	0
7	3	4	9	1	0
7	3	5	9	0	0
7	3	6	9	0	0
7	3	7	9	0	0
7	3	8	8	1	0
7	3	9	8	0	0
7	3	10	8	0	8
8	3	1	10	0	0
8	3	2	10	0	0
8	3	3	10	0	0
8	3	4	10	0	0
8	3	5	10	0	0
8	3	6	10	0	0
8	3	7	9	1	0
8	3	8	9	0	0
8	3	9	9	0	0
8	3	10	9	0	9
9	3	1	10	0	0
9	3	2	10	0	0
9	3	3	10	0	0
9	3	4	10	0	0
9	3	5	10	0	0
9	3	6	10	0	0
9	3	7	10	0	0
9	3	8	9	1	0
9	3	9	9	0	0
9	3	10	9	0	9

## Sheet: Pvalue
gr	description		P-value	Log-rank test for equality of survivor functions
1	not injection		gr	6	7
2	only PBS		2	0	0.0206
3	PE04-1		3		0.0206
4	PE04-1(NH2)		6		0.0002
5	PE04-2
6	ATCC19606
7	PE04-1 with ATCC19606		gr	6	8
8	PE04-1(NH2) with ATCC19606		2	0	0.0781
9	PE04-2 with ATCC19606		4		0.0781
			6		0
			gr	6	9
			2	0	0.1538
			5		0.1538
			6		0
