# Supplementary material for: Antimicrobial activity and synergistic effect of phage-encoded antimicrobial peptides with colistin and outer membrane permeabilizing agents against Acinetobacter baumannii
Source: PeerJ. 2024 Dec 24;12:e18722. doi: 10.7717/peerj.18722 (PMC11674141; doi:10.7717/peerj.18722)
Supplement: Supplemental Information 6 — The survival rates of the larvae in the different treatment groups were monitored for 10 days. The plotted points represent mortality events of PBS (control), AB329 (positive control), and AB329 mix with peptides (PE04-1, PE04-1(NH2), PE04-2). All experimental groups were performed in triplicate. [file peerj-12-18722-s006.xlsx]

## Sheet: Group 1
	not injection	only PBS	only	only	only	only AB329	CR04-WT	CR04-WT-NH2	CR04-CPP
DAY			CR04-WT	CR04-WT-NH2	CR04-CPP	10^8	with AB329	with AB329	with AB329
1	10	10	10	10	10	6	10	10	10
2	10	10	10	10	10	6	9	10	10
3	10	10	10	10	10	5	9	10	10
4	10	10	10	10	10	4	9	10	10
5	10	10	10	10	10	4	9	10	10
6	10	10	10	10	10	4	9	10	10
7	10	10	10	10	10	4	9	10	10
8	10	10	10	10	10	4	9	10	10
9	10	10	10	10	10	3	9	10	10
10	10	10	10	10	10	2	9	10	10

## Sheet: Group 2
	not injection	only PBS	only	only	only	only AB329	CR04-WT	CR04-WT-NH2	CR04-CPP
DAY			CR04-WT	CR04-WT-NH2	CR04-CPP	10^8	with AB329	with AB329	with AB329
1	10	10	10	10	10	7	10	10	10
2	10	10	10	10	10	6	10	10	10
3	10	10	10	10	10	6	10	10	10
4	10	10	10	10	10	4	10	10	10
5	10	10	10	10	10	4	9	9	10
6	10	10	10	10	10	3	9	9	10
7	10	10	10	10	10	3	9	9	9
8	10	10	10	10	10	3	9	9	9
9	10	10	10	10	10	3	9	9	9
10	10	10	10	10	10	3	9	9	9

## Sheet: Group 3
	not injection	only PBS	only	only	only	only AB329	CR04-WT	CR04-WT-NH2	CR04-CPP
DAY			CR04-WT	CR04-WT-NH2	CR04-CPP	10^8	with AB329	with AB329	with AB329
1	10	10	10	10	10	6	10	10	10
2	10	10	10	10	10	4	9	10	10
3	10	10	10	10	10	4	9	10	10
4	10	10	10	10	10	4	9	10	10
5	10	10	10	10	10	4	9	10	10
6	10	10	10	10	10	3	9	10	10
7	10	10	10	10	10	3	9	9	10
8	10	10	10	10	10	3	9	9	9
9	10	10	10	10	10	3	9	9	9
10	10	10	10	10	10	3	9	9	9
