# Supplementary material for: Antimicrobial activity and synergistic effect of phage-encoded antimicrobial peptides with colistin and outer membrane permeabilizing agents against Acinetobacter baumannii
Source: PeerJ. 2024 Dec 24;12:e18722. doi: 10.7717/peerj.18722 (PMC11674141; doi:10.7717/peerj.18722)
Supplement: Supplemental Information 10 — Peptide properties were investigated using the Antimicrobial Peptide Calculator and Predictor (https://aps.unmc.edu/prediction). Antibacterial activity class and subfamily were determined using AntiBP2. [file peerj-12-18722-s010.xlsx]

## Sheet: Table S1 
Table S1 Characteriatics of peptides used in this study
No.	bacteriophage	peptideCode ( Manuscript)	accession No.	Protein coded	Sequence	Hydrophobic ratio	Net charge	Hydropathy value	Molecular weight	AMP SCORE	Antibacterial Activiy	CLASS	SUB-FAMILY	ToxinPred	HemoPred	MIC (ATCC19606)µg/ml	peptide designer
1	vB_AbaM_PhT02; vPhT02	PE02-1	QHJ75684.1	Endolysin	LNSKDYAGAAAQFLVWNKGRVKGKL	0.44	4	-0.34	2735.17	1.765	YES	Frog	Dermaseptin	Non-Toxin	non-hemolytic (0%)	> 2500	SP
2	vB_AbaM_PhT02; vPhT02	PE02-2	QHJ75684.1	Endolysin-modified net charge	WNKGRVKGKLEVIPGLTNRRKKEKA	0.28	7	-1.32	2906	-0.257	Yes	no	no	Non-Toxin	non-hemolytic (0%)	1250	SP
3	vB_AbaM_PhT02; vPhT02	PIN02	QHJ75726.1	inhibitor of bacterial protein synthesis	KRQTLADKKERKKFHDGLMLNDNIR	0.28	4.25	-1.576	3055.54	-0.137	No	No	No	Non-Toxin	likely- hemolytic (71% probability)	> 5000	UL
4	vB_AbaM_PhT02; vPhT02	PTL02	QHJ75785.1	Tail lysozyme	KNRIIGPVYAKCNRSRQMALENMAF	0.44	4	-0.456	2911.47	0.235	YES	Mammals	Beta defensin	Non-Toxin	unlikely- hemolytic (15% probability)	5000	UL
6	vB_AbaM_PhT02; vPhT02	PSTF02	QHJ75776.1	Short tail fiber	EYRSSWTGAYGASVLNKYIGMGRNS	0.28	2	-0.628	2768.06	0.942	Yes	Bacteria	No	Non-Toxin	non-hemolytic (1%probability)	> 5000	UL
7	vB_AbaAut_ChT04; vChT04	PE04-1	WIS40123.1	Endolysin	LIAIQIAIKGMLNGWFTGVGFRRKR	0.52	5	0.376	2846.48	1.292	YES	Mammals	Cathelicidin	Non-Toxin	unlikely- hemolytic (39% probability)	312.5	SP
8	vB_AbaAut_ChT04; vChT04	PTTPAT04	WIS40082.1	Tail tubular protein A	ENMRNRKWNSTDTVMRRSRFQRYLR	0.24	6	-1.88	3301.77	-0.185	No	No	No	Non-Toxin	non-hemolytic (0%)	2500	UL
9	vB_AbaAut_ChT04; vChT04	PE04-2	WIS40123.1	Endolysin(hydrolase)-CPP modified	KIAIQIAIKGMLNGWFTGVGFRRKR	0.48	6	0.07	2861.89	1.567	Yes	Mammals	Cathelicidin	Non-Toxin	unlikely- hemolytic (10% probability)	156.25	SS
10	vB_AbaAut_ChT04; vChT04	PE04-1(NH2)	WIS40123.1	Endolysin (hydrolase)-Amides (NH2) added	LIAIQIAIKGMLNGWFTGVGFRRKR-NH2	0.52	5	0.38	2846	1.29	Yes	Mammals	Cathelicidin	Non-Toxin	not- hemolytic (2% probability)	156.25	SS
				Reference1	https://webs.iiitd.edu.in/raghava/antibp2/help.html?fbclid=IwAR0LitmaePmtauSXY7CVHmTlAHquBu27-h7FTKkyB6GD6tfZ9BdrMjt2xFQ
				Reference2	http://crdd.osdd.net/raghava/hemopi/design.php
				Reference3	http://aps.unmc.edu/AP/prediction/prediction_main.php
				Reference4	https://whttps://webs.iiitd.edu.in/raghava/cellppd/index.htmlebs.iiitd.edu.in/raghava/cellppd/index.html		CellPPD: Designing of CellWelcome to CellPPD Penetrating Peptides	CellPPD is an in silico method, which is developed to predict and design efficient cell penetrating peptides (CPPs). The main dataset used in this method consists of 708 experimentally validated CPPs.
