# Supplementary material for: Antimicrobial activity and synergistic effect of phage-encoded antimicrobial peptides with colistin and outer membrane permeabilizing agents against Acinetobacter baumannii
Source: PeerJ. 2024 Dec 24;12:e18722. doi: 10.7717/peerj.18722 (PMC11674141; doi:10.7717/peerj.18722)
Supplement: Supplemental Information 11 [file peerj-12-18722-s011.xlsx]

## Sheet: TableS2
Table 2 Minimum Inhibitory Concentration (MIC) of phage encoded peptides against MDRAB, XDRAB and other bacterial species
Strain	Resistance Profile	PE04-1	PE04-1(NH2)	PE04-2
		(ug/ml)	(ug/ml)	(ug/ml)
A. baumannii 19606	sensitive	312.5	156.25	156.25
AB003	MDR-AB	312.5	156.25	78.12
CR89	MDR-AB	312.5	312.5	156.25
AB183	XDR-AB	156.25	156.25	78.12
AB329	XDR-AB	625	312.5	156.25
P. aeruginosa	sensitive	2500	2500	312.5
K. pneumoniae	sensitive	2500	625	312.5
E. coli	sensitive	2500	156.25	156.25
S. aureus	sensitive	39.06	39.06	39.06
B. subtilis	sensitive	39.06	19.531	39.06
