# Supplementary material for: Antimicrobial activity and synergistic effect of phage-encoded antimicrobial peptides with colistin and outer membrane permeabilizing agents against Acinetobacter baumannii
Source: PeerJ. 2024 Dec 24;12:e18722. doi: 10.7717/peerj.18722 (PMC11674141; doi:10.7717/peerj.18722)
Supplement: Supplemental Information 12 [file peerj-12-18722-s012.xlsx]

## Sheet: TableS3
Table S3 minimum inhibitory concentration (MIC) values for outer membrane permeabilizers (OMPs) and colistin against A. baumannii 19606
agents	MIC values (ug/ml)	0.25MIC (ug/ml)
Colistin	2	0.5
EDTA	625	156.25
DL-Malic acid	2500	625
Lactic acid	5000	1250
Citric acid	5000	1250
Benzoic acid	5000	1250
MIC values were determined with triplicate samples for each peptide concentration using a standard microdilution assay accoding to CLSI 2021
