# Supplementary material for: Antimicrobial activity and synergistic effect of phage-encoded antimicrobial peptides with colistin and outer membrane permeabilizing agents against Acinetobacter baumannii
Source: PeerJ. 2024 Dec 24;12:e18722. doi: 10.7717/peerj.18722 (PMC11674141; doi:10.7717/peerj.18722)
Supplement: Supplemental Information 13 — Growth Inhibition of peptide combine with colistin, EDTA, and four weak acids (benzoic acid, malic acid, lactic acid and citric acid). [file peerj-12-18722-s013.xlsx]

## Sheet: TableS4
Table S4	Growth Inhibition of peptide combine with colistin, EDTA, and four weak acids (benzoic acid, malic acid, lactic acid and citric acid)
	PE04-1			PE04-1(NH2)			PE04-2			Average	Average	Average	Stdv	Stdv	Stdv
	exp1	exp2	exp3	exp1	exp2	exp3	exp1	exp2	exp3	PE04-1	PE04-1(NH2)	PE04-2	PE04-1	PE04-1(NH2)	PE04-2
Colistin	99.6536	99.692	99.4941	99.9313	99.9317	99.8999	99.749	99.6753	99.6067	99.6132	99.921	99.677	0.104946	0.0182297	0.0711614
EDTA	73.8136	72.5873	72.0405	83.1731	82.582	82.6217	99.1753	99.026	99.1062	72.8138	82.7923	99.1025	0.908033	0.330393	0.0747471
benzoic acid	40.0762	41.6496	41.1467	40.6593	39.071	40.7272	48.6913	48.088	49.3386	40.9575	40.1525	48.706	0.803562	0.937196	0.625406
malic acid	71.2504	70.1916	71.5008	85.0962	85.4508	86.2241	85.5504	86.6883	84.8051	70.981	85.5904	85.6813	0.694948	0.576802	0.948382
lactic acid	66.886	65.5373	66.5767	49.6566	51.1612	50.3336	87.1997	85.6782	86.5928	66.3334	50.3838	86.4902	0.706538	0.753561	0.765917
citric acid	99.6536	99.6235	99.3592	99.8626	99.9317	99.7665	99.8924	99.7475	99.7497	99.5455	99.8536	99.7965	0.162006	0.0829603	0.0830487
	PE04-1	SD	PE04-1(NH2)	PE04-2	PE04-2	SD
Colistin	99.61	0.1	99.92	0.02	99.68	0.07
EDTA	72.81	0.9	82.79	0.3	99.1	0.1
benzoic acid	40.96	0.8	40.15	0.9	48.71	0.6
malic acid	70.98	0.7	85.59	0.6	85.68	0.9
lactic acid	66.33	0.7	50.38	0.8	86.49	0.8
citric acid	99.55	0.2	99.85	0.1	99.8	0.1
