# Supplementary material for: Antimicrobial activity and synergistic effect of phage-encoded antimicrobial peptides with colistin and outer membrane permeabilizing agents against Acinetobacter baumannii
Source: PeerJ. 2024 Dec 24;12:e18722. doi: 10.7717/peerj.18722 (PMC11674141; doi:10.7717/peerj.18722)
Supplement: Supplemental Information 14 [file peerj-12-18722-s014.xlsx]

## Sheet: TableS5
Table S5 The results of confirmatory testing for synergistic interaction
Strain	MIC colistin	(ug/ml)	MIC	(ug/ml)	FICI
			PE04-1
	alone	combined	alone	combined
ATCC19606	2	0.25	312.5	19.53	0.19
Strain	MIC citric acid	(ug/ml)	MIC PE04-1	(ug/ml)	FICI
	alone	combined	alone	combined
ATCC19606	5000	625	312.5	78.12	0.37
Strain	MIC colistin	(ug/ml)	MIC PE04-1-NH2	(ug/ml)	FICI
	alone	combined	alone	combined
ATCC19606	2	0.25	156.25	9.76	0.19
Strain	MIC citric acid	(ug/ml)	MIC PE04-1-NH2	(ug/ml)	FICI
	alone	combined	alone	combined
ATCC19606	5000	625	156.25	39.06	0.37
Strain	MIC colistin	(ug/ml)	MIC PE04-2	(ug/ml)	FICI
	alone	combined	alone	combined
ATCC19606	2	0.125	156.25	19.53	0.14
Strain	MIC citric acid	(ug/ml)	MIC PE04-2	(ug/ml)	FICI
	alone	combined	alone	combined
ATCC19606	5000	625	156.25	19.53	0.25
