# Supplementary material for: Antimicrobial activity and synergistic effect of phage-encoded antimicrobial peptides with colistin and outer membrane permeabilizing agents against Acinetobacter baumannii
Source: PeerJ. 2024 Dec 24;12:e18722. doi: 10.7717/peerj.18722 (PMC11674141; doi:10.7717/peerj.18722)
Supplement: Supplemental Information 15 — Percent biofilm forming inhibition of peptides against 20 A. baumanii strains [file peerj-12-18722-s015.xlsx]

## Sheet: TableS6
Table S6 Percent biofilm forming nhibition of peptides against 20 A. baumanii strains
A. baumanii strains	year of isolation	Drug resistance pattern	Colistin Resistance MIC	PE04-1	PE04-1(NH2)	PE04-2	Average	Stdv
AB134	2014	MDR-AB / CR-AB	NA	74.8604	93.6215	92.401	86.961	10.4971
AB329	2015	XDR-AB / CR-AB	1 ug/ml	62.2852	40.4352	84.5601	62.4269	22.0628
CR65-40	2022	MDR-AB / CR-AB	8 ug/ml	26.3789	46.5428	84.7377	52.5531	29.64
CR65-47	2022	MDR-AB / CR-AB	2 ug/ml	61.4919	88.475	90.516	80.161	16.2001
CR65-51	2022	XDR-AB / CR-AB	2 ug/ml	76.0019	85.9663	95.0785	85.6822	9.54147
CR65-55	2022	MDR-AB / CR-AB	2 ug/ml	51.2583	91.4607	99.7108	80.8099	25.9228
CR65-71	2022	MDR-AB / CR-AB	4 ug/ml	18.3769	52.3711	98.5171	56.4217	40.2234
AB20	2013	MDR-AB	NA	71.3477	64.3187	92.3188	75.9951	14.5671
AB21	2013	MDR-AB / CR-AB	NA	40.9843	71.0943	92.3077	68.1288	25.7899
AB57	2013	XDR-AB / CR-AB	1 ug/ml	28.961	57.567	92.3659	59.6313	31.7528
AB143	2014	MDR-AB / CR-AB	NA	38.1833	73.4988	90.7178	67.4666	26.7816
CR65-74	2022	XDR-AB / CR-AB	2 ug/ml	36.5302	98.2629	97.4059	77.3997	35.3966
CR65-43	2022	XDR-AB / CR-AB	4 ug/ml	70.7645	74.6851	53.6542	66.368	11.1836
AB23	2013	MDR-AB / CR-AB	NA	92.1075	97.721	94.897	94.9085	2.80678
AB59	2013	XDR-AB / CR-AB	0.5 ug/ml	87.1605	97.5361	97.1521	93.9496	5.88265
AB72	2013	drug sensitive	NA	61.3636	63.5016	97.541	74.1354	20.298
AB152	2014	MDR-AB / CR-AB	NA	61.8193	63.3787	98.229	74.4757	20.5858
AB175	2014	MDR-AB / CR-AB	NA	44.2133	71.463	98.1818	71.286	26.9847
AB236	2014	MDR-AB / CR-AB	NA	85.9239	88.6942	99.6724	91.4302	7.27117
AB263	2014	MDR-AB	NA	72.361	89.6713	88.4382	83.4901	9.65785
